# Supplementary material for: Use of Technology-Based Interventions in the Treatment of Patients with Overweight and Obesity: A Systematic Review
Source: PubMed Central journal article supplement (PMC7760174; doi:10.3390/nu12123634), 2020-11-26
Supplement: nutrients-12-03634-s001.pdf [file nutrients-12-03634-s001.pdf]

**Supplementary S1.** Weight lost according to the technology used.

|                   | <b>Nr of Groups that used it</b> | <b>Average weight loss ( kg)</b> |
|-------------------|----------------------------------|----------------------------------|
| <b>Smartphone</b> | App                              | 23                               |
|                   | SMS                              | 11                               |
| Virtual reality   | 4                                | 4.7                              |
| Website           | 4                                | 3.75                             |
| PDA or EJ         | 6                                | 2.00                             |
| PA monitor        | 4                                | 6.21                             |
| Online software   | 3                                | 2.95                             |
| DVD               | 1                                | 0.48                             |
